# Supplementary material for: Gauss–Seidel limb scattering (GSLS) radiative transfer model development in support of the Ozone Mapping and Profiler Suite (OMPS) limb profiler mission
Source: Copernicus journal article supplement (doi:10.5194/acp-15-3007-2015), 2015-03-17
Supplement: Supplementary file 1 [file acp-15-3007-2015-supplement.zip]

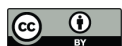

## *Supplement of*

# **Gauss–Seidel limb scattering (GSLs) radiative transfer model development in support of the Ozone Mapping and Profiler Suite (OMPS) limb profiler mission**

**R. Loughman et al.**

*Correspondence to:* R. Loughman ([robert.loughman@hamptonu.edu](mailto:robert.loughman@hamptonu.edu))

- [acp-15-3007-2015-supplement-cover-letter.pdf](#)
- 004lo
- 004rl
- 005lo
- 005rl
- L04-aer-prf-325
- L04-aer-prf-345
- L04-aer-prf-600
- [acp-2014-507-supplement-README.txt](#)
- densO3\_initial
- pressure.dat
- temperature.dat
